# Supplementary material for: Nickel salt of phosphomolybdic acid as a bi-functional homogeneous recyclable catalyst for base free transformation of aldehyde into ester
Source: Royal Society of Chemistry journal article supplement (doi:10.1039/d0ra04119j), 2020-01-01
Supplement: d0ra04119j1.pdf [file d0ra04119j1.pdf]

## Supplementary Information

Nickel salt of Phosphomolybdic acid as a bi-functional homogeneous recyclable catalyst for base free transformation of aldehyde into ester

Anjali Patel\* and Jay Patel

\*Polyoxometalates and Catalysis Laboratory, Department of Chemistry, Faculty of Science, The Maharaja Sayajirao University of Baroda, Vadodara-390002, India.

\*E-mail: anjali.patel-chem@msubaroda.ac.in

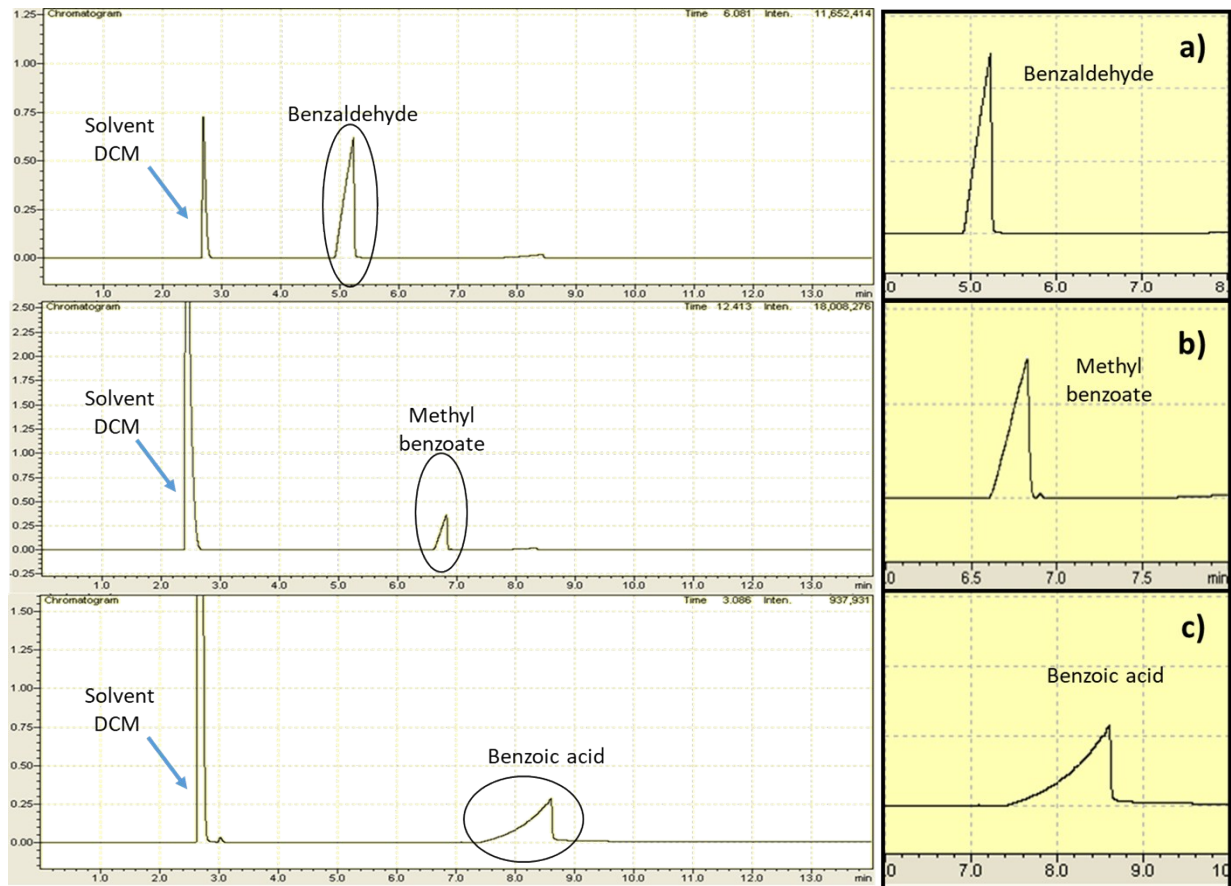

**Figure 1S.** GC Profile of stander a) DCM + benzaldehyde b) DCM + Methyl benzoate c) DCM + benzoic acid

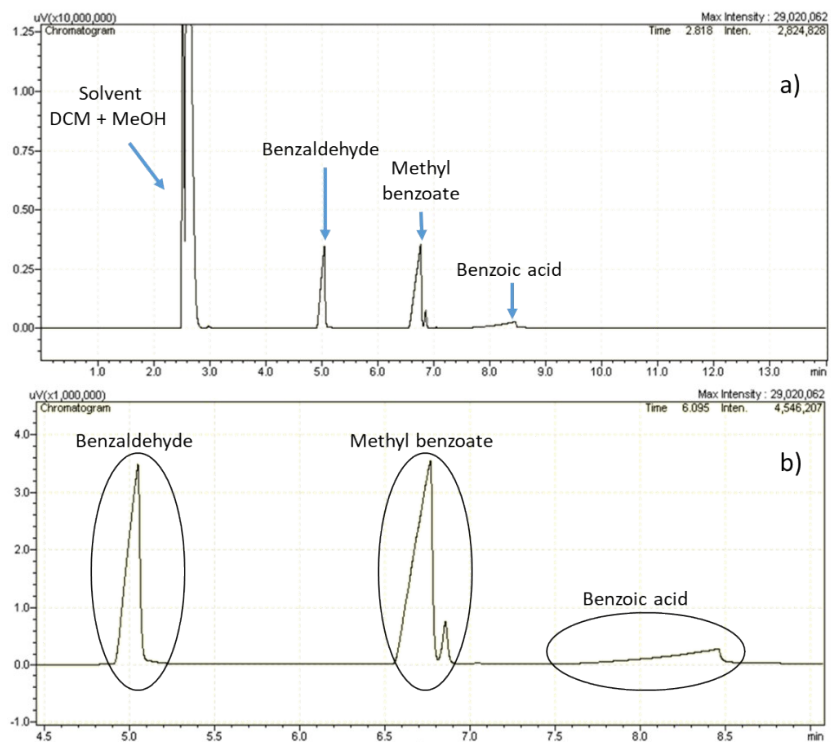

Figure S2. GC Analysis profile optimized conditions

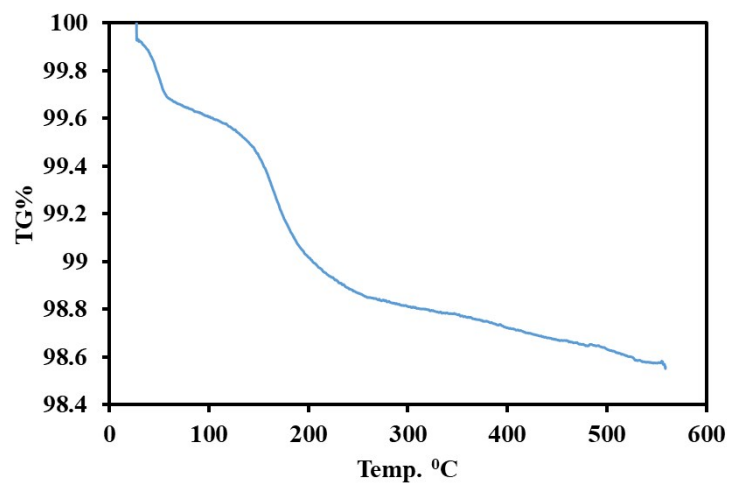

Figure S3. TGA of NiHPMA

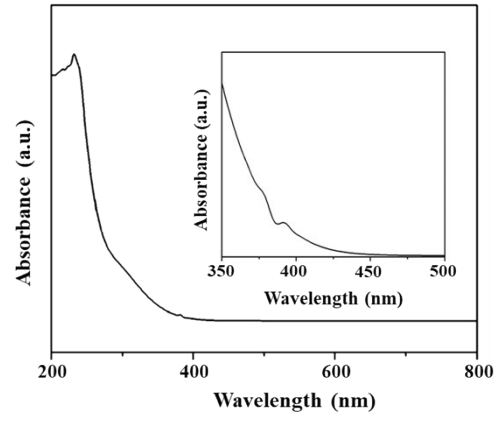

**Figure S4.** UV-Visible spectra of NiHPMA
